# Supplementary figures and images for: Aryl Hydrocarbon Receptor Promotes Cell Growth, Stemness Like Characteristics, and Metastasis in Human Ovarian Cancer via Activation of PI3K/Akt, β-Catenin, and Epithelial to Mesenchymal Transition Pathways
Source: MDPI journal article supplement (doi:10.3390/ijms23126395), 2022-06-07

**Figure S1**

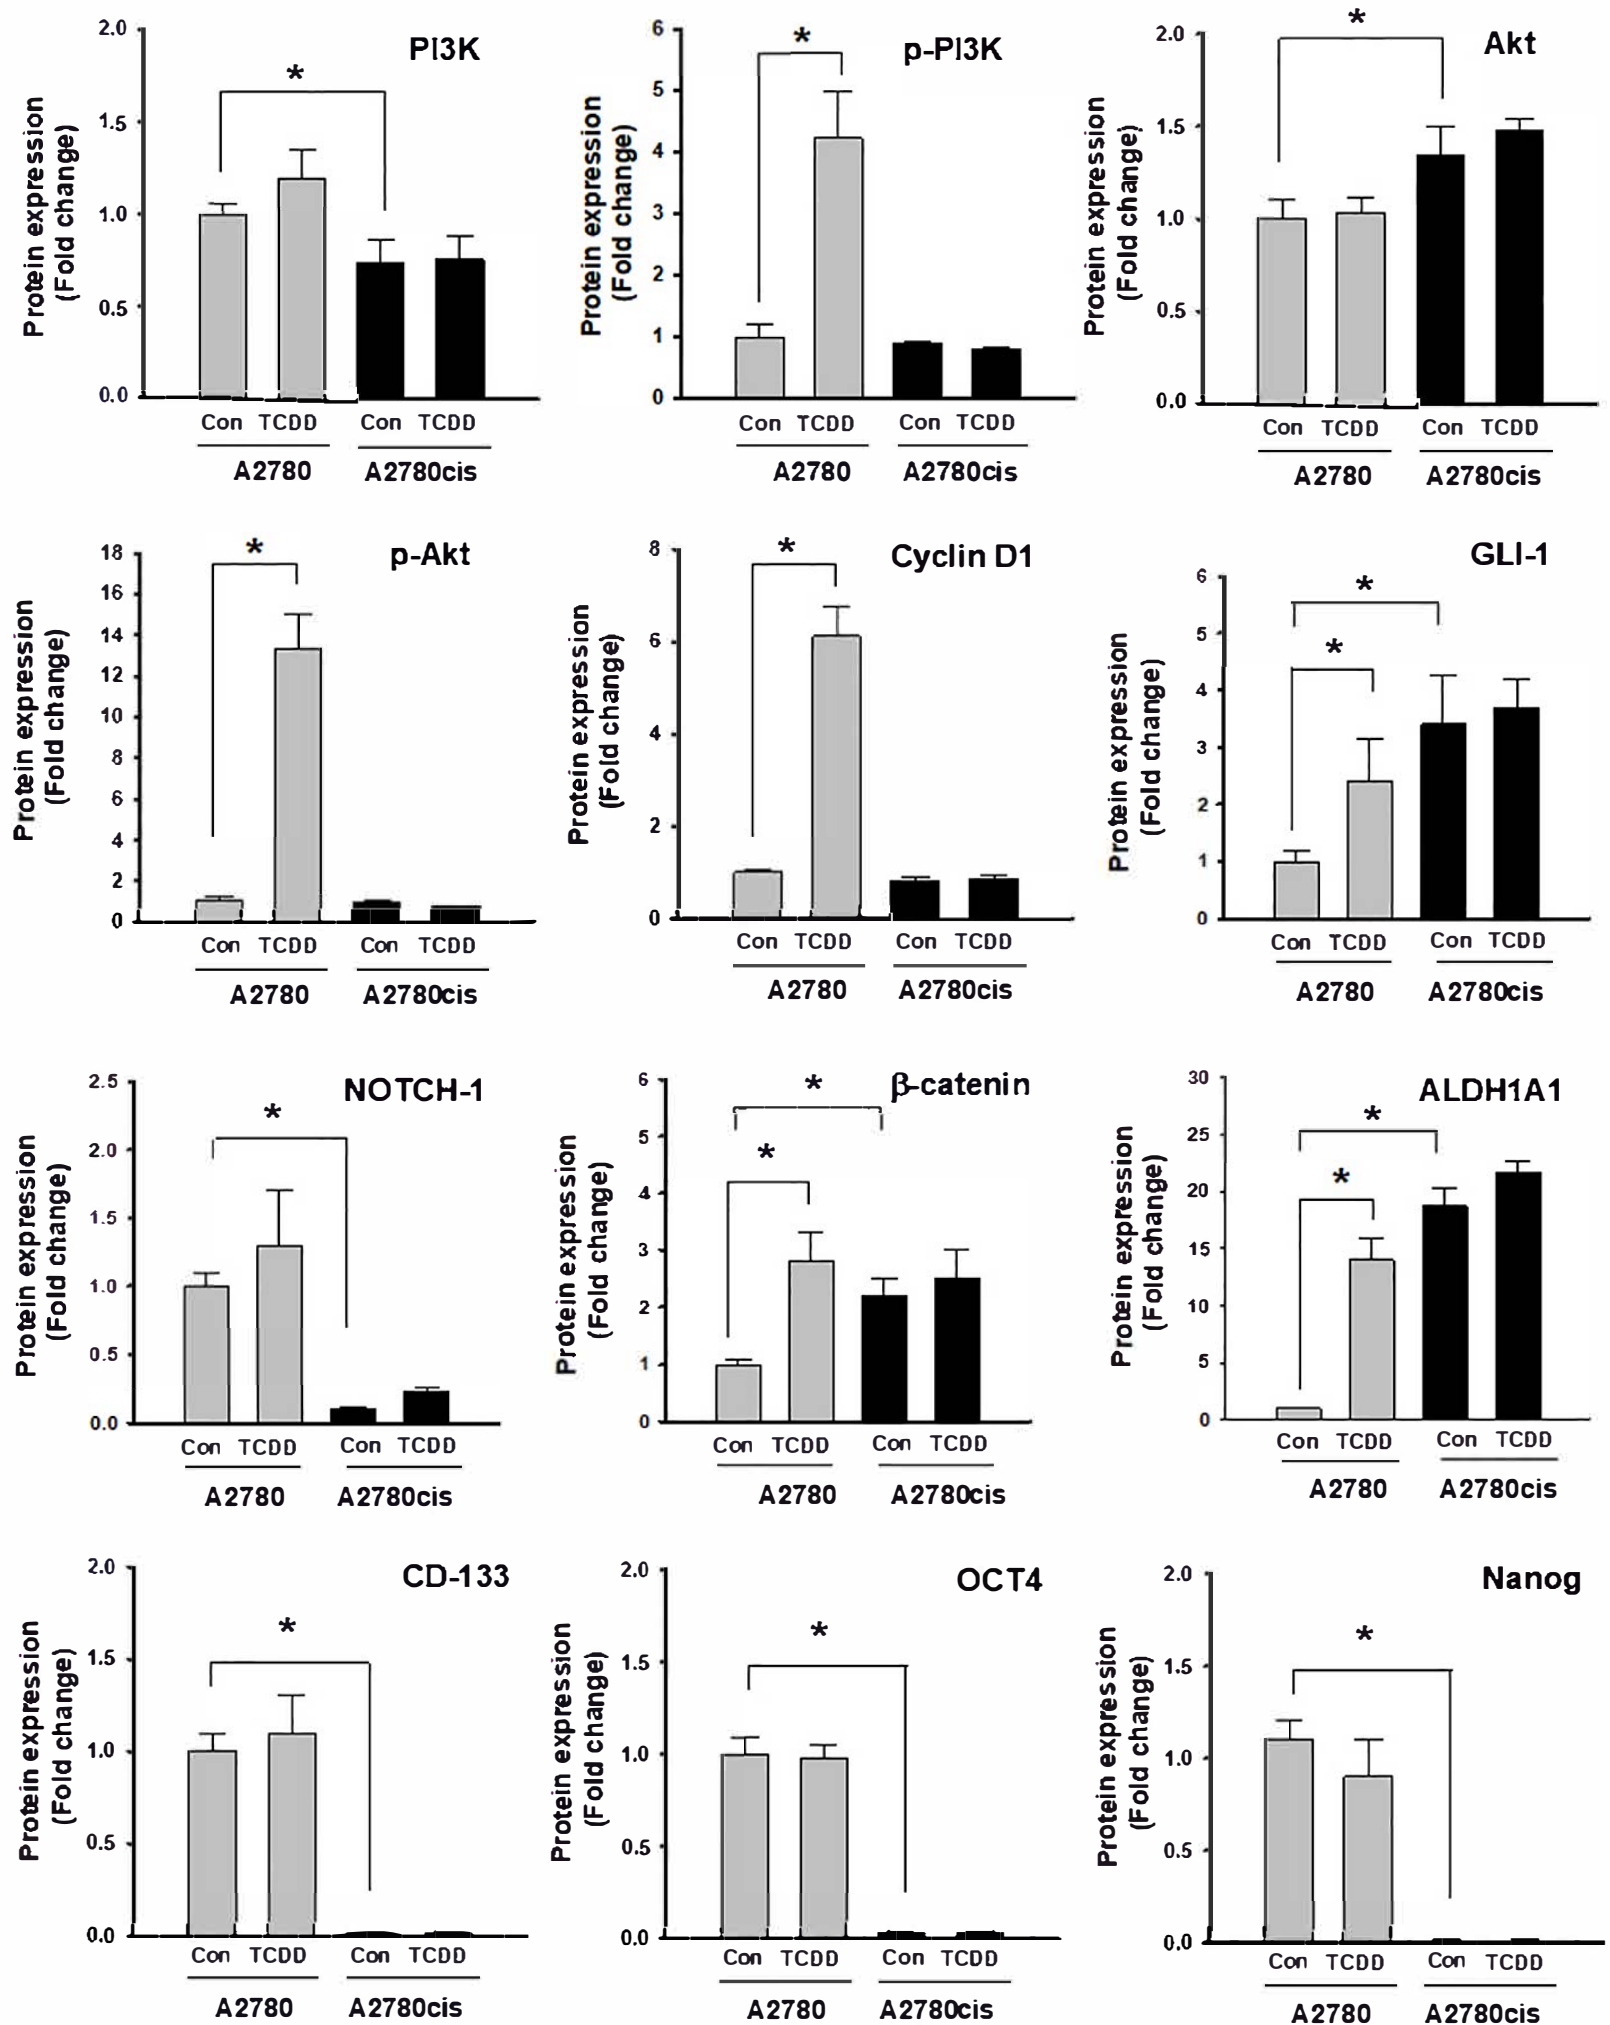

Figure S2

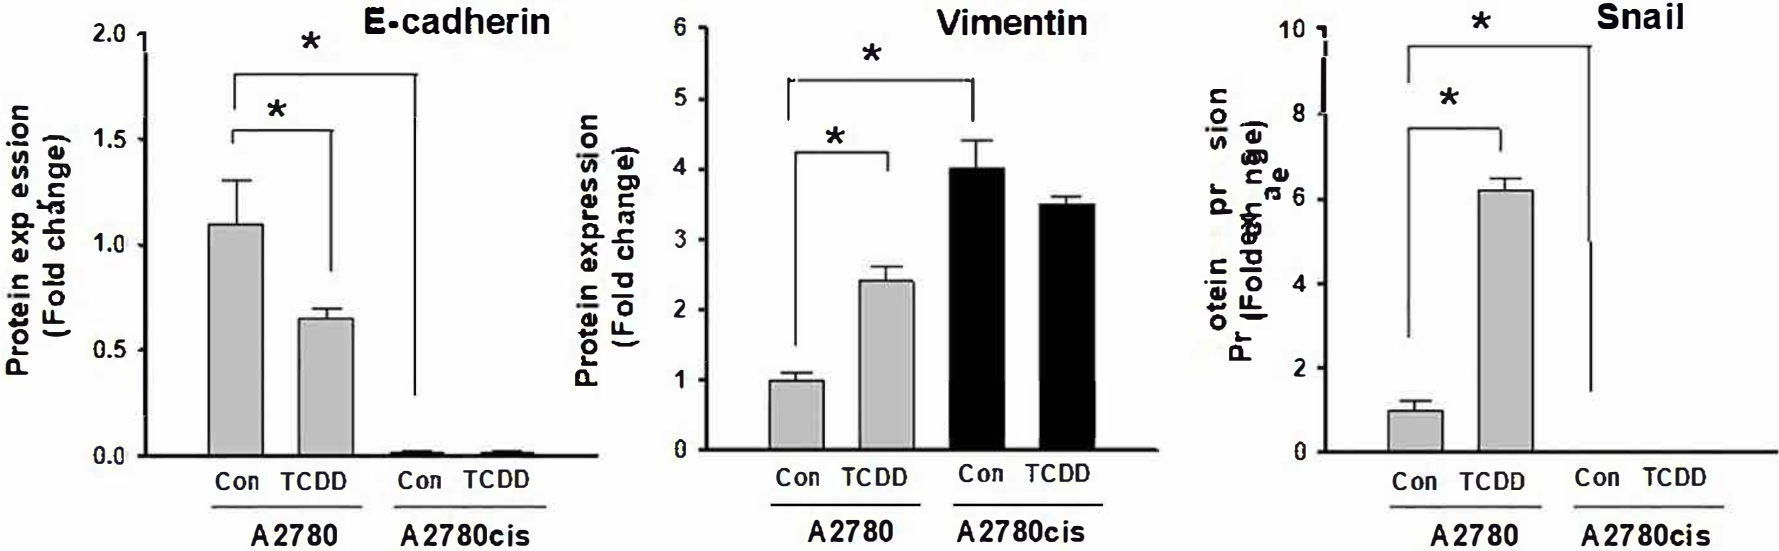

Supplement: s1 [file s1]
